# Supplementary figures and images for: Enantiopure lanthanide complexes incorporating a tetraazatriphenylene sensitiser and three naphthyl groups: exciton coupling, intramolecular energy transfer, efficient singlet oxygen formation and perturbation by DNA binding
Source: Royal Society of Chemistry journal article supplement (doi:10.1039/b303085g), 2003-01-01

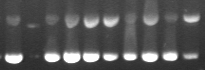

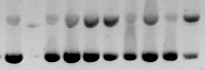

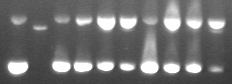

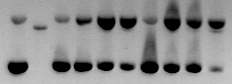


**Eu(R/S)Naphdpq**

**: 0 5 15 45 ∆: 0 5 15 45 mins**

**Tb(R/S)Naphdpq**

**0 5 15 45 0 5 15 45 mins**

Supplement: b303085g.doc [file b303085g.doc]
